# Supplementary material for: Three-dimensional mesoporous Sn–Ni@C network derived from cyanogel coordination polymers: towards high-performance anodes for lithium storage
Source: Royal Society of Chemistry journal article supplement (doi:10.1039/c3ce41647j), 2013-01-01
Supplement: c3ce41647j.pdf [file c3ce41647j.pdf]

# Three-Dimensional Mesoporous Sn–Ni@C Network Derived from Cyanogel Coordination Polymers: Towards High-Performance Anodes for Lithium Storage

Jianping Li, Ping Wu,\* Yawen Tang, Xiali Xu, Yiming Zhou, Yu Chen and Tianhong

Lu

Jiangsu Key Laboratory of New Power Batteries, Jiangsu Collaborative Innovation

Center of Biomedical Functional Materials, School of Chemistry and Materials

Science, Nanjing Normal University, Nanjing 210023, PR China.

E-mail: [zjuwuping@njnu.edu.cn](mailto:zjuwuping@njnu.edu.cn)

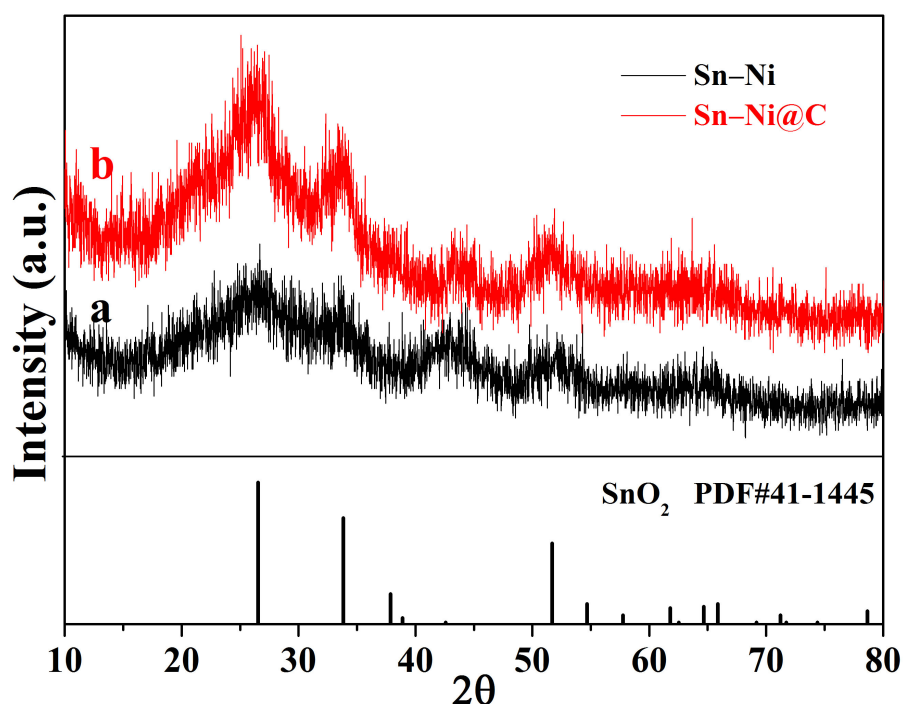

**Fig. S1** XRD patterns of 3DMP Sn–Ni alloy network (curve *a*) and 3DMP Sn–Ni@C network (curve *b*).

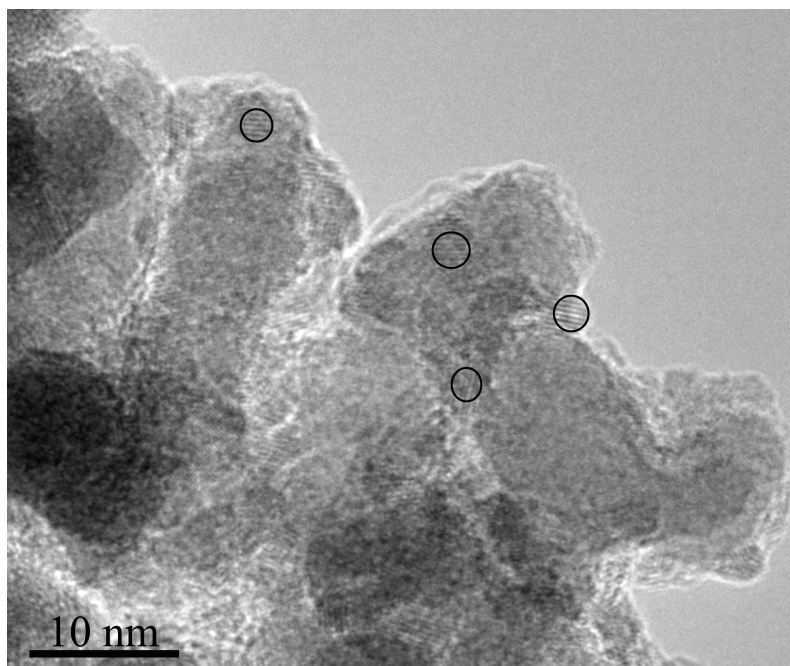

**Fig. S2** HRTEM image of 3DMP Sn–Ni alloy network.

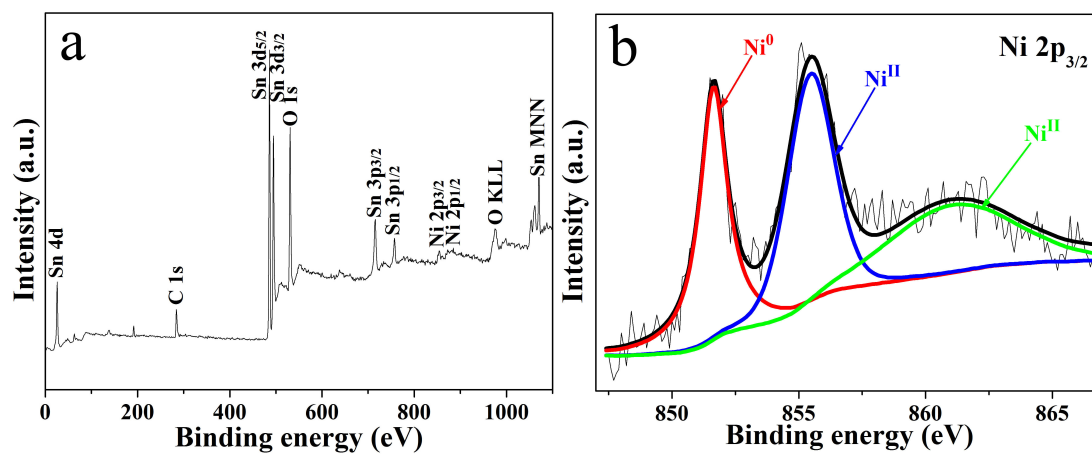

**Fig. S3** XPS spectra of 3DMP Sn–Ni alloy network: (a) survey spectrum, and (b) Ni 2p<sub>3/2</sub>.

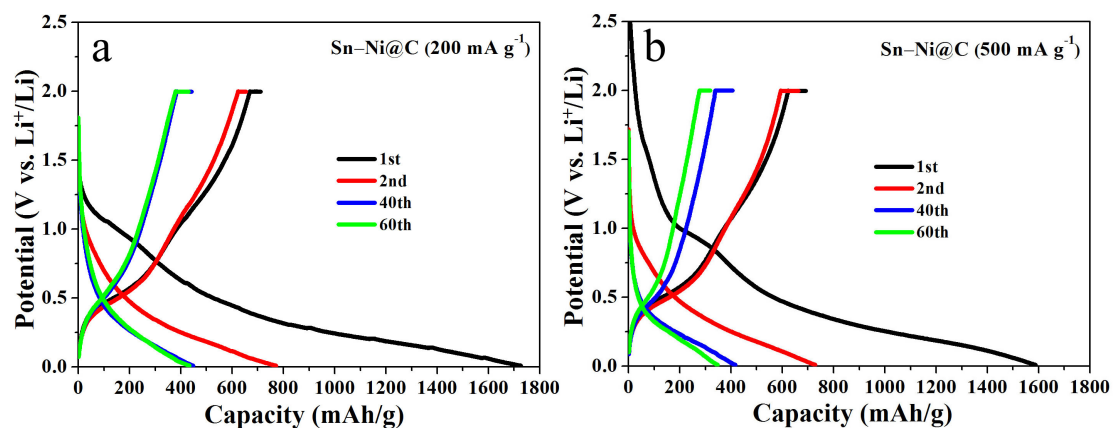

**Fig. S4** The 1<sup>st</sup>, 2<sup>nd</sup>, 40<sup>th</sup>, and 60<sup>th</sup> discharge and charge curves for Sn-Ni@C alloy network in the potential range of 0.01-2 V at current densities of 200 and 500 mA g<sup>-1</sup>, respectively.

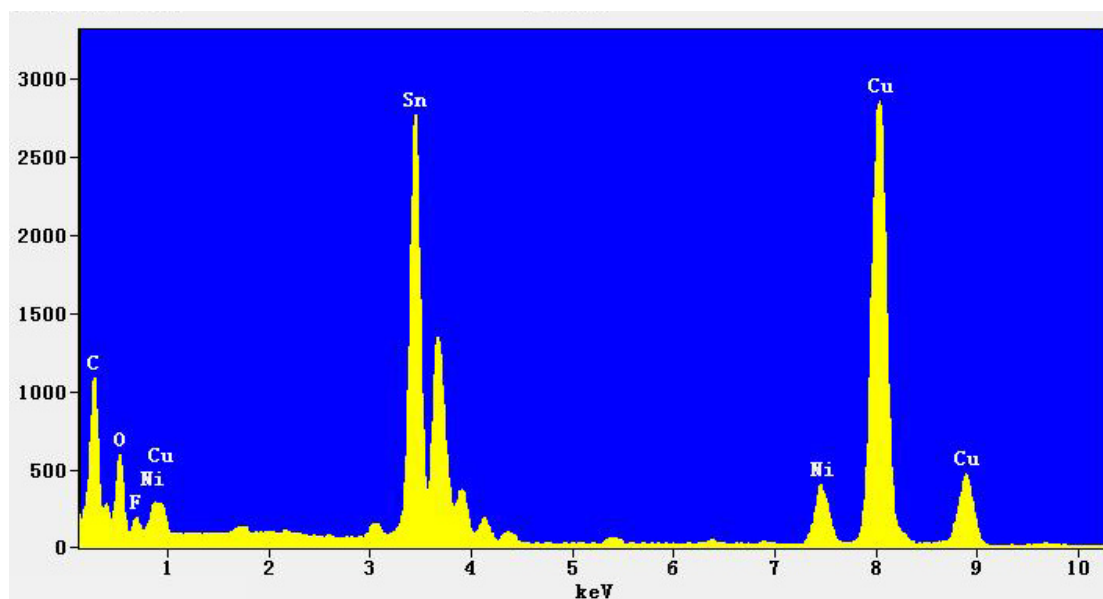

**Fig. S5** EDX spectrum of 3DMP Sn-Ni@C network in a fully de-lithiated state after 5 cycles.
